# Supplementary material
Source: PubMed Central journal article supplement (PMC10637756)
Supplement: NIHMS1914297-supplement-Supplemental_Digital_Content_2.pdf [file NIHMS1914297-supplement-Supplemental_Digital_Content_2.pdf]

**Appendix 1. Exclusions for Population-based Research to Optimize the Screening Process (PROSPR) MultiLevel  
optimization of the cervical Cancer Screening process in diverse Settings & populations (METRICS) Cohort  
Members with an Abnormal Cervical Cancer Test**

|                                                                                        | <b>Total in Cohort<br/>n = 764,715</b> | <b>KPWA<br/>n = 321,173</b> | <b>PH<br/>n = 225,907</b> | <b>MGB<br/>n = 217,635</b> |
|----------------------------------------------------------------------------------------|----------------------------------------|-----------------------------|---------------------------|----------------------------|
| <b>Exclusions</b>                                                                      | <b>Total n = 747,174</b>               | <b>Total n = 317,279</b>    | <b>Total n = 218,790</b>  | <b>Total n = 211,105</b>   |
| <21 years old or >79 years old throughout study period                                 | n = 31,104                             | n = 22,167                  | n = 1,712                 | n = 7,225                  |
| No Pap/HPV test                                                                        | n = 325,236                            | n = 158,255                 | n = 81,590                | n = 85,391                 |
| Only abnormal Pap test outside of age range                                            | n = 1,205                              | n = 281                     | n = 751                   | n = 173                    |
| Only normal/ineligible abnormal Pap test                                               | n = 379,168                            | n = 134,570                 | n = 127,032               | n = 117,566                |
| Cervical cancer prior to abnormal Pap test                                             | n = 266                                | n = 99                      | n = 78                    | n = 89                     |
| Hysterectomy prior to abnormal Pap test                                                | n = 99                                 | n = 8                       | n = 57                    | n = 34                     |
| Pregnant at abnormal Pap test                                                          | n = 7,043                              | n = 392                     | n = 6,364                 | n = 287                    |
| Only diagnostic abnormal Pap test or left the cohort the day of the abnormal Pap test  | n = 1,746                              | n = 297                     | n = 1,123                 | n = 326                    |
| Did not remain in the cohort through the end of the initial management period (Year 0) | n = 1,307                              | n = 1,210                   | n = 83                    | n = 14                     |
| <b>Included Study Cohort</b>                                                           | <b>n = 17,541</b>                      | <b>n = 3,894</b>            | <b>n = 7,117</b>          | <b>n = 6,530</b>           |

Exclusions were applied sequentially in the order listed.

Alimena S, Lykken JM, Tiro JA, Chubak J, Kamineni A, Haas JS, et al. Timing of colposcopy and risk of cervical cancer. *Obstet Gynecol* 2023;142.

The authors provided this information as a supplement to their article.

©2023 American College of Obstetricians and Gynecologists.

**Appendix 2. Demographic and Test Characteristics of Population-based Research to Optimize the Screening Process (PROSPR) MultiLevel opTimization of the ceRvIcal Cancer Screening process in diverse Settings & populations (METRICS) Cohort Members at Index Abnormal Cervical Cancer Test by Site and Initial Management Period**

|                                                                                                               | KPWA                                                           |                                                                  |                                                                           | PH                                                             |                                                                  |                                                                           | MGB                                                            |                                                                  |                                                                           |
|---------------------------------------------------------------------------------------------------------------|----------------------------------------------------------------|------------------------------------------------------------------|---------------------------------------------------------------------------|----------------------------------------------------------------|------------------------------------------------------------------|---------------------------------------------------------------------------|----------------------------------------------------------------|------------------------------------------------------------------|---------------------------------------------------------------------------|
| <b>Initial Management Period<sup>1</sup></b>                                                                  | <b>Colposcopy<br/>≤3 mos<br/>after<br/>abnormal<br/>result</b> | <b>Colposcopy<br/>3-12 mos<br/>after<br/>abnormal<br/>result</b> | <b>No<br/>Colposcopy<br/>within 12<br/>mos of<br/>abnormal<br/>result</b> | <b>Colposcopy<br/>≤3 mos<br/>after<br/>abnormal<br/>result</b> | <b>Colposcopy<br/>3-12 mos<br/>after<br/>abnormal<br/>result</b> | <b>No<br/>Colposcopy<br/>within 12<br/>mos of<br/>abnormal<br/>result</b> | <b>Colposcopy<br/>≤3 mos<br/>after<br/>abnormal<br/>result</b> | <b>Colposcopy<br/>3-12 mos<br/>after<br/>abnormal<br/>result</b> | <b>No<br/>Colposcopy<br/>within 12<br/>mos of<br/>abnormal<br/>result</b> |
| <b>Total Patients with<br/>Qualifying<br/>Abnormal Test<br/>Total Year 0<br/>Cancer Diagnoses<sup>2</sup></b> | 2,976                                                          | 378                                                              | 540                                                                       | 2,724                                                          | 2,565                                                            | 1,828                                                                     | 3,654                                                          | 957                                                              | 1,919                                                                     |
| <b>Total Eligible<br/>Patients for<br/>Analysis<sup>3</sup></b>                                               | 2,927                                                          | 374                                                              | 539                                                                       | 2,670                                                          | 2,550                                                            | 1,825                                                                     | 3,637                                                          | 954                                                              | 1,918                                                                     |

Alimena S, Lykken JM, Tiro JA, Chubak J, Kamineni A, Haas JS, et al. Timing of colposcopy and risk of cervical cancer. *Obstet Gynecol* 2023;142.

The authors provided this information as a supplement to their article.

©2023 American College of Obstetricians and Gynecologists.

| <b>Patient Characteristics at Abnormal Test</b> | n (Row %)  | n (Row %)  | n (Row %)  | n (Row %)    | n (Row %)    | n (Row %)  | n (Row %)    | n (Row %)  | n (Row %)  |
|-------------------------------------------------|------------|------------|------------|--------------|--------------|------------|--------------|------------|------------|
| <b>Age (years)</b>                              |            |            |            |              |              |            |              |            |            |
| 21-29                                           | 702 (74.4) | 117 (12.4) | 124 (13.2) | 736 (35.1)   | 793 (37.8)   | 570 (27.2) | 1,060 (53.4) | 330 (16.6) | 595 (30.0) |
| 30-39                                           | 920 (79.7) | 106 (9.2)  | 129 (11.2) | 1,027 (42.3) | 900 (37.2)   | 504 (20.7) | 1,298 (58.8) | 306 (13.9) | 604 (27.4) |
| 40-49                                           | 628 (76.9) | 76 (9.3)   | 113 (13.8) | 606 (41.9)   | 525 (36.3)   | 314 (21.7) | 694 (57.6)   | 164 (13.6) | 346 (28.7) |
| 50-59                                           | 451 (73.9) | 49 (8.0)   | 110 (18.0) | 224 (30.2)   | 239 (32.2)   | 280 (37.7) | 397 (54.1)   | 101 (13.8) | 236 (32.2) |
| 60-69                                           | 205 (73.0) | 20 (7.1)   | 56 (19.9)  | 62 (22.0)    | 80 (28.4)    | 140 (49.7) | 155 (48.9)   | 43 (13.6)  | 119 (37.5) |
| 70-79                                           | 21 (61.8)  | 6 (17.7)   | 7 (20.6)   | 15 (33.3)    | 13 (28.9)    | 17 (37.8)  | 33 (54.1)    | 10 (16.4)  | 18 (29.5)  |
| <b>Race/Ethnicity</b>                           |            |            |            |              |              |            |              |            |            |
| Hispanic                                        | 209 (73.6) | 31 (10.9)  | 44 (15.5)  | 1,855 (41.6) | 1,749 (39.2) | 853 (19.1) | 803 (58.5)   | 271 (19.7) | 299 (21.8) |
| Asian / Pacific Islander, Non-Hispanic          | 360 (76.1) | 45 (9.5)   | 68 (14.4)  | 40 (44.4)    | 28 (31.1)    | 22 (24.4)  | 196 (58.9)   | 43 (12.9)  | 94 (28.2)  |
| Black, Non-Hispanic                             | 161 (70.6) | 28 (12.3)  | 39 (17.1)  | 572 (29.2)   | 624 (31.8)   | 765 (39.0) | 362 (51.9)   | 103 (14.8) | 233 (33.4) |

Alimena S, Lykken JM, Tiro JA, Chubak J, Kamineni A, Haas JS, et al. Timing of colposcopy and risk of cervical cancer. *Obstet Gynecol* 2023;142.

The authors provided this information as a supplement to their article.

©2023 American College of Obstetricians and Gynecologists.

|                                    |              |           |            |              |              |              |              |            |              |
|------------------------------------|--------------|-----------|------------|--------------|--------------|--------------|--------------|------------|--------------|
| White, Non-Hispanic                | 1,975 (76.9) | 244 (9.5) | 349 (13.6) | 195 (37.9)   | 144 (28.0)   | 176 (34.2)   | 2,165 (56.1) | 491 (12.7) | 1,206 (31.2) |
| None of the Above / Multiple Races | 162 (78.6)   | 20 (9.7)  | 24 (11.7)  | 5 (38.5)     | 5 (38.5)     | <5 (23.1)    | 95 (50.5)    | 36 (19.2)  | 57 (30.3)    |
| Unknown                            | 60           | 6         | 15         | <5           | 0            | 6            | 16           | 10         | 29           |
| <b>Health Insurance</b>            |              |           |            |              |              |              |              |            |              |
| Commercial                         | 2,725 (76.5) | 351 (9.9) | 486 (13.6) | 97 (33.5)    | 73 (25.2)    | 120 (41.4)   | 2,390 (56.9) | 534 (12.7) | 1,274 (30.4) |
| Medicare                           | 122 (72.2)   | 15 (8.9)  | 32 (18.9)  | 89 (26.7)    | 93 (27.8)    | 152 (45.5)   | 175 (48.9)   | 61 (17.0)  | 122 (34.1)   |
| Medicaid/Other/Uninsured           | 80 (73.4)    | 8 (7.3)   | 21 (19.3)  | 2,476 (38.8) | 2,373 (37.2) | 1,539 (24.1) | 1,055 (54.8) | 353 (18.3) | 518 (26.9)   |
| Unknown                            | 0            | 0         | 0          | 8            | 11           | 14           | 17           | 6          | <5           |
| <b>Comorbidity Score</b>           |              |           |            |              |              |              |              |            |              |
| 0-1                                | 2,368 (76.0) | 309 (9.9) | 438 (14.1) | 2,234 (39.3) | 2,158 (37.9) | 1,299 (22.8) | 2,894 (55.2) | 777 (14.8) | 1,571 (30.0) |
| 2+                                 | 207 (73.7)   | 28 (10.0) | 46 (16.4)  | 436 (32.2)   | 392 (29.0)   | 526 (38.9)   | 611 (59.9)   | 153 (15.0) | 256 (25.1)   |
| Unknown                            | 352          | 37        | 55         | 0            | 0            | 0            | 132          | 24         | 91           |
| <b>BMI (kg/m<sup>2</sup>)</b>      |              |           |            |              |              |              |              |            |              |
| <18.5                              | 46 (71.9)    | 7 (10.9)  | 11 (17.2)  | 30 (38.0)    | 20 (25.3)    | 29 (36.7)    | 102 (51.8)   | 24 (12.2)  | 71 (36.0)    |
| 18.5–24.9                          | 1,303 (77.3) | 158 (9.4) | 225 (13.4) | 649 (37.9)   | 625 (36.5)   | 440 (25.7)   | 1,780 (56.8) | 436 (13.9) | 916 (29.3)   |

Alimena S, Lykken JM, Tiro JA, Chubak J, Kamineni A, Haas JS, et al. Timing of colposcopy and risk of cervical cancer. *Obstet Gynecol* 2023;142.

The authors provided this information as a supplement to their article.

©2023 American College of Obstetricians and Gynecologists.

|                                          |              |            |            |              |              |            |              |            |            |
|------------------------------------------|--------------|------------|------------|--------------|--------------|------------|--------------|------------|------------|
| 25.0–29.9                                | 710 (74.2)   | 103 (10.8) | 144 (15.1) | 861 (38.3)   | 820 (36.5)   | 567 (25.2) | 979 (56.6)   | 258 (14.9) | 494 (28.5) |
| ≥30.0                                    | 865 (76.8)   | 105 (9.3)  | 157 (13.9) | 1,128 (37.9) | 1,082 (36.3) | 769 (25.8) | 729 (54.0)   | 223 (16.5) | 397 (29.4) |
| Unknown                                  | <5           | <5         | <5         | <5           | <5           | 20         | 47           | 13         | 40         |
| <b>Yost Quintile<br/>(State)</b>         |              |            |            |              |              |            |              |            |            |
| 1                                        | 290 (75.3)   | 45 (11.7)  | 50 (13.0)  | 1,160 (38.5) | 1,070 (35.6) | 780 (25.9) | 816 (57.9)   | 264 (18.7) | 329 (23.4) |
| 2                                        | 516 (76.2)   | 69 (10.2)  | 92 (13.6)  | 709 (36.9)   | 744 (38.8)   | 467 (24.3) | 440 (54.5)   | 130 (16.1) | 238 (29.5) |
| 3                                        | 589 (76.9)   | 64 (8.4)   | 113 (14.8) | 336 (38.7)   | 311 (35.8)   | 221 (25.5) | 461 (56.5)   | 110 (13.5) | 245 (30.0) |
| 4                                        | 775 (77.2)   | 92 (9.2)   | 137 (13.7) | 232 (36.7)   | 213 (33.7)   | 188 (29.7) | 605 (53.6)   | 159 (14.1) | 364 (32.3) |
| 5                                        | 672 (75.2)   | 87 (9.7)   | 135 (15.1) | 87 (39.0)    | 69 (30.9)    | 67 (30.0)  | 1,147 (56.5) | 248 (12.2) | 634 (31.3) |
| Unknown                                  | 85           | 17         | 12         | 146          | 143          | 102        | 168          | 43         | 108        |
| <b>Abnormal Test<br/>Characteristics</b> |              |            |            |              |              |            |              |            |            |
| <b>Risk Status at<br/>Abnormal Test</b>  |              |            |            |              |              |            |              |            |            |
| Surveillance/Alternate Risk              | 536 (63.9)   | 120 (14.3) | 183 (21.8) | 746 (28.0)   | 1120 (42.1)  | 795 (29.9) | 1,386 (48.3) | 531 (18.5) | 950 (33.1) |
| Average Risk                             | 1,193 (81.3) | 116 (7.9)  | 159 (10.8) | 1,019 (44.1) | 826 (35.8)   | 465 (20.1) | 1,486 (63.9) | 256 (11.0) | 583 (25.1) |

Alimena S, Lykken JM, Tiro JA, Chubak J, Kamineni A, Haas JS, et al. Timing of colposcopy and risk of cervical cancer. *Obstet Gynecol* 2023;142.

The authors provided this information as a supplement to their article.

©2023 American College of Obstetricians and Gynecologists.

|                                                    |              |            |            |              |              |              |              |            |              |
|----------------------------------------------------|--------------|------------|------------|--------------|--------------|--------------|--------------|------------|--------------|
| Unknown Risk                                       | 1,198 (78.2) | 138 (9.0)  | 197 (12.9) | 905 (43.6)   | 604 (29.1)   | 565 (27.2)   | 765 (58.1)   | 167 (12.7) | 385 (29.2)   |
| <b>Abnormal Test Result</b>                        |              |            |            |              |              |              |              |            |              |
| High-Grade (≥HSIL)                                 | 1,030 (77.7) | 121 (9.1)  | 174 (13.1) | 932 (65.0)   | 273 (19.0)   | 230 (16.0)   | 598 (66.4)   | 110 (12.2) | 193 (21.4)   |
| Low-Grade (≤LSIL)                                  | 1,857 (77.9) | 238 (10.0) | 289 (12.1) | 1,690 (31.8) | 2,155 (40.5) | 1,471 (27.7) | 2,774 (57.5) | 722 (15.0) | 1,330 (27.6) |
| Persistent Mild Abnormality                        | 40 (30.5)    | 15 (11.5)  | 76 (58.0)  | 48 (16.3)    | 122 (41.5)   | 124 (42.2)   | 265 (33.9)   | 122 (15.6) | 395 (50.5)   |
| <b>Initial Management Characteristics</b>          |              |            |            |              |              |              |              |            |              |
| <b>Most Severe Pathology in Year 0<sup>4</sup></b> |              |            |            |              |              |              |              |            |              |
| AIS / CIN III / CIN II / HSIL                      | 438 (89.8)   | 50 (10.3)  | 0          | 739 (64.7)   | 404 (35.4)   | 0            | 458 (80.9)   | 108 (19.1) | 0            |
| LSIL / CIN I                                       | 676 (90.6)   | 70 (9.4)   | 0          | 1,220 (47.3) | 1,359 (52.7) | 0            | 623 (82.3)   | 134 (17.7) | 0            |

Alimena S, Lykken JM, Tiro JA, Chubak J, Kamineni A, Haas JS, et al. Timing of colposcopy and risk of cervical cancer. *Obstet Gynecol* 2023;142.

The authors provided this information as a supplement to their article.

©2023 American College of Obstetricians and Gynecologists.

|                          |              |            |             |              |              |                  |              |            |                  |
|--------------------------|--------------|------------|-------------|--------------|--------------|------------------|--------------|------------|------------------|
| HPV /                    |              |            |             |              |              |                  |              |            |                  |
| Condylomata /            | 633 (91.1)   | 62 (8.9)   | 0           | 196 (45.8)   | 232 (54.2)   | 0                | 240 (82.5)   | 51 (17.5)  | 0                |
| Atypia                   |              |            |             |              |              |                  |              |            |                  |
| Normal                   | 805 (87.2)   | 118 (12.8) | 0           | 493 (51.0)   | 474 (49.0)   | 0                | 2,084 (78.9) | 558 (21.1) | 0                |
| Insufficient /           |              |            |             |              |              |                  |              |            |                  |
| Unknown / No             | 375 (83.5)   | 74 (16.5)  | 0           | 22 (21.4)    | 81 (78.6)    | 0                | 232 (69.3)   | 103 (30.8) | 0                |
| Biopsy                   |              |            |             |              |              |                  |              |            |                  |
| No Procedure             | 0            | 0          | 539 (100.0) | 0            | 0            | 1,825<br>(100.0) | 0            | 0          | 1,918<br>(100.0) |
| <b>Treatment</b>         |              |            |             |              |              |                  |              |            |                  |
| <b>Completed in Year</b> |              |            |             |              |              |                  |              |            |                  |
| <b>0<sup>5</sup></b>     |              |            |             |              |              |                  |              |            |                  |
| No                       | 2,321 (73.2) | 310 (9.8)  | 539 (17.0)  | 1,900 (32.1) | 2,192 (37.1) | 1,825 (30.8)     | 3,081 (52.8) | 840 (14.4) | 1,918 (32.9)     |
| Yes                      | 606 (90.5)   | 64 (9.6)   | 0           | 770 (68.3)   | 358 (31.7)   | 0                | 556 (83.0)   | 114 (17.0) | 0                |

<sup>1</sup> Initial Management Period reflects time to first procedure as either within 3 months ( $\leq 91$  days), 3-12 months (92-365 days), or not within 12 months (see Figure 1). Additional procedures may have occurred at later in that time period or beyond. Age, risk status, abnormal test result, most severe pathology in Year 0, and whether treatment was completed in Year 0 were significantly different ( $p < 0.001$ ) by initial management across all sites; race/ethnicity, health insurance, and comorbidity score were significantly different ( $p < 0.001$ ) by initial management at PH and MGB; BMI was significantly different ( $p < 0.001$ ) by initial management at PH; and Yost quintile was significantly different ( $p < 0.001$ ) by initial management at MGB.

Alimena S, Lykken JM, Tiro JA, Chubak J, Kamineni A, Haas JS, et al. Timing of colposcopy and risk of cervical cancer. *Obstet Gynecol* 2023;142.

The authors provided this information as a supplement to their article.

©2023 American College of Obstetricians and Gynecologists.

<sup>2</sup> Cancer diagnoses were identified through pathology reports and central cancer registries. Cancer diagnoses made among patients for whom a procedure was not documented during the Initial Management Period (Months 0-12) were identified exclusively from central cancer registries.

<sup>3</sup> Patients diagnosed with cancer in Months 0-12 were excluded from Total Eligible Patients for Analysis because these cancers were detected before the start of follow-up.

<sup>4</sup> Most severe pathology result recorded for all procedures that occurred in Initial Management Period (Months 0-12).

<sup>5</sup> Treatment included LEEP, cone, or unspecified excisional procedure as well as cryotherapy or laser ablation.



**Appendix 3. Surveillance, Epidemiology, and End Results (SEER) Stages for Cancers Diagnosed During the Initial Management Period and Follow-up Period After Abnormal Cervical Cancer Test**

| SEER Stage <sup>1</sup>                               | Total     | Colposcopy ≤3 mos After Abnormal Result | Colposcopy 3-12 mos After Abnormal Result | No Colposcopy Within 12 mos of Abnormal Result |
|-------------------------------------------------------|-----------|-----------------------------------------|-------------------------------------------|------------------------------------------------|
| <b>Cancers Diagnosed in Months 0-12<sup>2</sup></b>   | 147       | 120                                     | 22                                        | 5                                              |
| Localized                                             | 74 (70.5) | 60 (72.3)                               | 13 (76.5)                                 | <5 (20.0)                                      |
| Regional                                              | 26 (24.8) | 20 (24.1)                               | <5 (23.5)                                 | <5 (40.0)                                      |
| Distant Site(s)/Node(s)                               | <5 (3.8)  | <5 (2.4)                                | 0                                         | <5 (40.0)                                      |
| Unknown/Unstaged                                      | 43        | 38                                      | 5                                         | 0                                              |
| <b>Cancers Diagnosed during Follow-Up<sup>3</sup></b> | 65        | 27                                      | 13                                        | 25                                             |
| Localized                                             | 30 (76.9) | 15 (93.8)                               | 6 (85.7)                                  | 9 (56.3)                                       |
| Regional                                              | 8 (20.5)  | <5 (6.3)                                | 0                                         | 7 (43.8)                                       |
| Distant Site(s)/Node(s)                               | <5 (2.6)  | 0                                       | <5 (14.3)                                 | 0                                              |
| Unknown/Unstaged                                      | 26        | 11                                      | 6                                         | 9                                              |

<sup>1</sup> Reflects the Surveillance, Epidemiology, and End Results (SEER) stage of the cervical cancer diagnosed.

<sup>2</sup> Includes cervical cancers diagnosed 0-12 months (≤365 days) from the abnormal cervical cancer test.

<sup>3</sup> Includes cervical cancers diagnosed at least 12 months (>365 days) from the abnormal cervical cancer test through cohort exit.

**Appendix 4. Time to cervical cancer diagnosis after index abnormal cervical cancer test and initial management period, stratified by cytology result severity and risk status. Kaplan-Meier estimates for cumulative detection of cervical cancer after an abnormal cervical cancer test and the initial management period, stratified by result severity. Cumulative detection estimates stratified by risk status are shown for low-grade abnormalities (n = 12,525).**

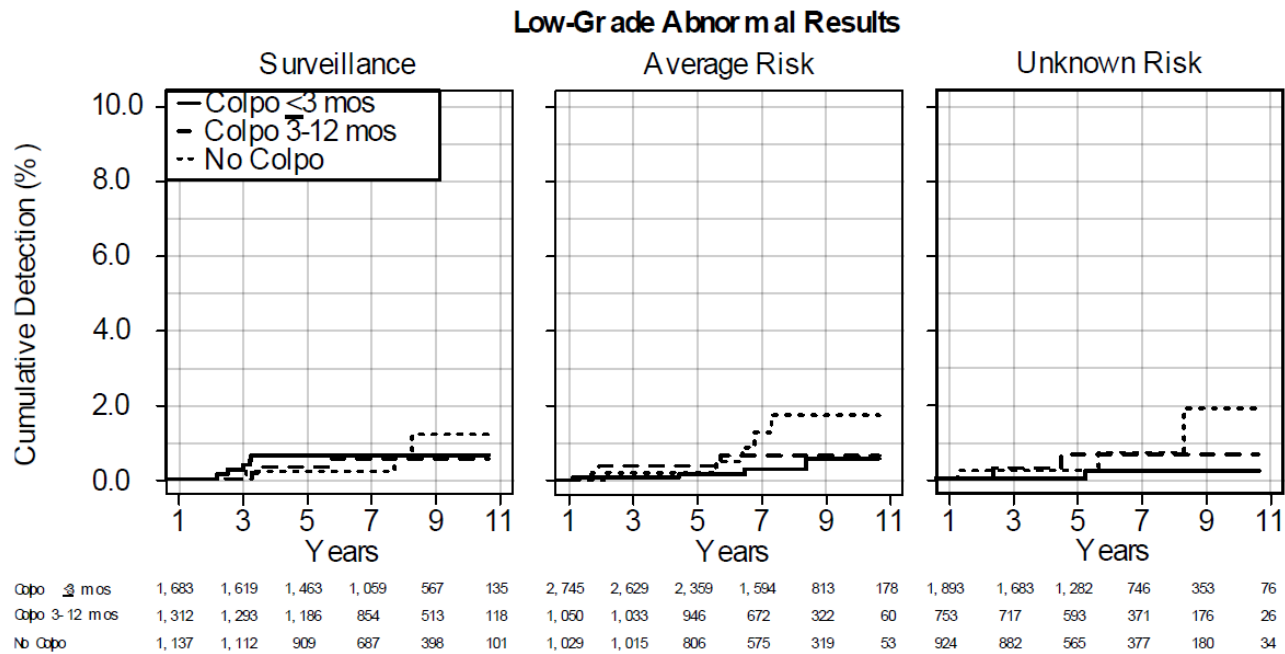

Alimena S, Lykken JM, Tiro JA, Chubak J, Kamineneni A, Haas JS, et al. Timing of colposcopy and risk of cervical cancer. *Obstet Gynecol* 2023;142.

The authors provided this information as a supplement to their article.

©2023 American College of Obstetricians and Gynecologists.
